# Supplementary material for: Pressurized Chemical Looping for Direct Reduced Iron Production: Economics of Carbon Neutral Process Configurations
Source: MDPI journal article supplement (doi:10.3390/en17030545), 2024-01-23
Supplement: s1 [file s1]

# Pressurized Chemical Looping for Direct Reduced Iron Production: Economics of Carbon Neutral Process Configurations

## Supplementary Data

**Table S1.** Cost formulas applied by process unit.

| Item                                         | Method                                                                                                                                               | Reference                                  |
|----------------------------------------------|------------------------------------------------------------------------------------------------------------------------------------------------------|--------------------------------------------|
| <b>PCL reactor</b>                           |                                                                                                                                                      |                                            |
| Reformer tubes                               | Heat exchanger; U-tube                                                                                                                               | Seider 4th edition                         |
| Pressure vessel                              | Mulet, Corripio, and evans (1981a, b); mass of vessel calculated with an allowance for platforms, ladders, a nominal number of nozzles and manholes. | Seider 4th edition                         |
| Reactor internals                            | Factor of pressure vessel cost (20%)                                                                                                                 | Industrial expertise                       |
| Refractory                                   | Quote for materials and installation labour                                                                                                          | RHI, Harbinson-Walker, Kingston Refractory |
| <b>External fluidized bed heat exchanger</b> |                                                                                                                                                      |                                            |
| Reformer tubes                               | Heat exchanger; U-tube                                                                                                                               | Seider 4th edition                         |
| Pressure vessel                              | Mulet, Corripio, and evans (1981a, b); mass of vessel calculated with an allowance for platforms, ladders, a nominal number of nozzles and manholes. | Seider 4th edition                         |
| <b>Cyclones</b>                              |                                                                                                                                                      |                                            |
| Cyclones                                     | Dust collector; cyclone                                                                                                                              | Seider 4th edition                         |
| Pressure vessel                              | Pressure vessel sized to contain large number of small cyclones necessary to meet particle cut.                                                      | Seider 4th edition                         |
|                                              | Mulet, Corripio, and evans (1981a, b); mass of vessel calculated with an allowance for platforms, ladders, a nominal number of nozzles and manholes. |                                            |
| Refractory                                   | Quote for materials and installation labour                                                                                                          | RHI, Harbinson-Walker, Kingston Refractory |
| <b>Candle filter</b>                         |                                                                                                                                                      |                                            |
| Filter elements                              | Vendor quote                                                                                                                                         | Mott Filters                               |

|                                   |                                                                                                                                                      |                                     |
|-----------------------------------|------------------------------------------------------------------------------------------------------------------------------------------------------|-------------------------------------|
| Pressure vessel                   | Pressure vessel sized to contain filter elements with required face velocity.                                                                        | Seider 4th edition                  |
|                                   | Mulet, Corripio, and evans (1981a, b); mass of vessel calculated with an allowance for platforms, ladders, a nominal number of nozzles and manholes. |                                     |
| <b>Amine absorber/regenerator</b> |                                                                                                                                                      |                                     |
| Tower                             | Tower; packed w/ stainless steel pall rings                                                                                                          | Seider 4th edition                  |
|                                   | Mass of vessel calculated with an allowance for platforms, ladders, a nominal number of nozzles and manholes.                                        |                                     |
| Condenser                         | Compact heat exchanger; plate and frame                                                                                                              | Seider 4th edition                  |
| Reboiler                          | Heat exchanger; kettle vaporizer                                                                                                                     | Seider 4th edition                  |
| <b>Simple equipment</b>           |                                                                                                                                                      |                                     |
| Compressor                        | Centrifugal                                                                                                                                          | Seider 4th edition                  |
| Direct contact cooler             | Tower; packed w/ stainless steel pall rings                                                                                                          | Seider 4th edition                  |
|                                   | Mass of vessel calculated with an allowance for platforms, ladders, a nominal number of nozzles and manholes.                                        |                                     |
| Dryer                             | Solid                                                                                                                                                | GPSA Engineering Data Book. (2004). |
| Duct burner                       | Incinerator; sized based on duty of injected natural gas                                                                                             | Ulrich 1984                         |
| Expansion turbine                 | Power recovery turbine; gas expander                                                                                                                 | Seider 4th edition                  |
| Fan                               | Centrifugal, backward curved                                                                                                                         | Seider 4th edition                  |
| Filter (solid-liquid)             | Solid-liquid separator; filter; plate and frame                                                                                                      | Seider 4th edition                  |
| Gas / liquid separators           | Vapour liquid separator                                                                                                                              | GPSA Engineering Data Book. (2004). |
| Heat exchangers (shell and tube)  | Floating head                                                                                                                                        | Seider 4th edition                  |
| Heat exchangers (compact)         | Plate and frame                                                                                                                                      | Seider 4th edition                  |
| Pressure vessels                  | Mass of vessel calculated with an allowance for platforms, ladders, a nominal number of nozzles and manholes.                                        | Seider 4th edition                  |
| Pumps                             | Centrifugal                                                                                                                                          | Turton 5th Edition                  |
| Reformer (Base case)              | Fired heater; reformer                                                                                                                               | Seider 4th edition                  |
| Shaft furnace                     | Gas-solid contactors; gravity shaft; brick lined                                                                                                     | Ulrich 1984                         |
| Solids transport                  | Bucket elevator                                                                                                                                      | Seider 4th edition                  |

|               |                                                                                                                                                      |                    |
|---------------|------------------------------------------------------------------------------------------------------------------------------------------------------|--------------------|
| Storage bins  | Bin                                                                                                                                                  | Seider 4th edition |
| Storage silos | Storage tank, cone roof                                                                                                                              | Seider 4th edition |
| Vessels       | Mulet, Corripio, and evans (1981a, b); mass of vessel calculated with an allowance for platforms, ladders, a nominal number of nozzles and manholes. | Seider 4th edition |

---
